# Supplementary material for: In-MIL-68 derived In2O3/Fe2O3 shuttle-like structures with n–n heterojunctions to improve ethanol sensing performance
Source: Royal Society of Chemistry journal article supplement (doi:10.1039/d3cp05003c), 2023-12-27
Supplement: d3cp05003c1.pdf [file d3cp05003c1.pdf]

Electronic Supporting Information for  
**In-MIL-68 derived  $\text{In}_2\text{O}_3/\text{Fe}_2\text{O}_3$  shuttle-like structures with n-n  
heterojunctions to improve ethanol sensing performance**

Zhenyue Liu <sup>a</sup>, Zhenkai Zhang <sup>a</sup>, Chen Yue <sup>a</sup>, Yang Mu <sup>a</sup>, Zhiguo Yang <sup>a</sup>, Davoud  
Dastan <sup>b</sup>, Xi-Tao Yin <sup>a,\*</sup>, Xiaoguang Ma <sup>a,\*</sup>

<sup>a</sup> *School of Physics and Optoelectronic Engineering, Ludong University, Yantai 264000, China*

<sup>b</sup> *Department of Materials Science and Engineering, Cornell University, Ithaca, NY, 14850,  
USA*

---

\* Corresponding Authors E-mail: [yxtaj@163.com](mailto:yxtaj@163.com) (Xi-Tao Yin);

[hsiaoguangma@ldu.edu.cn](mailto:hxiaoguangma@ldu.edu.cn) (Xiaoguang Ma).

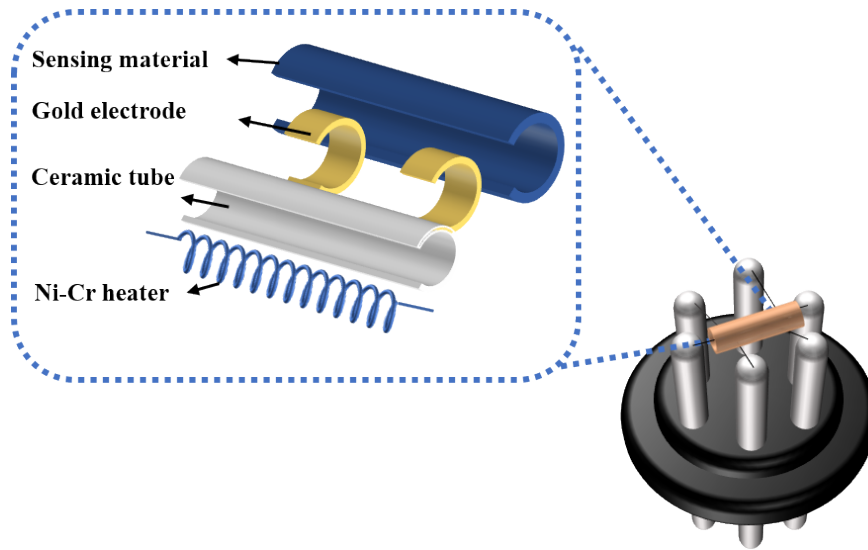

**Fig. S1.** Structure diagram of the gas sensor.

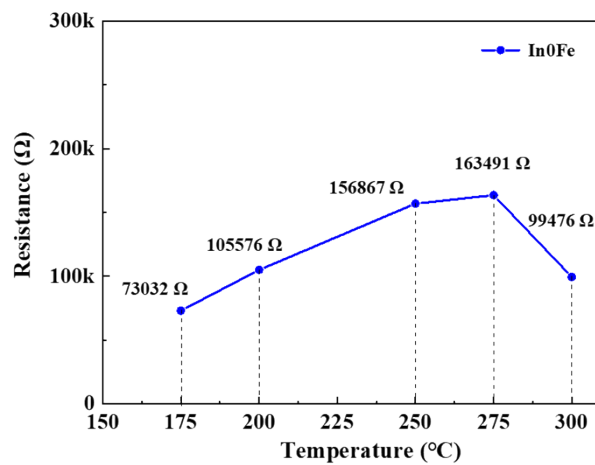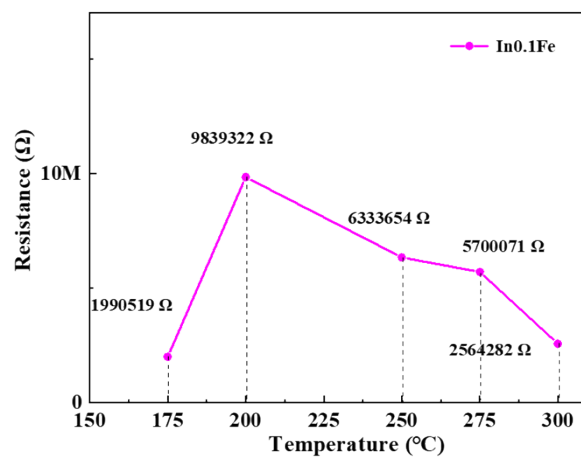

**Fig. S2.** Change of ground state resistance at different temperatures.

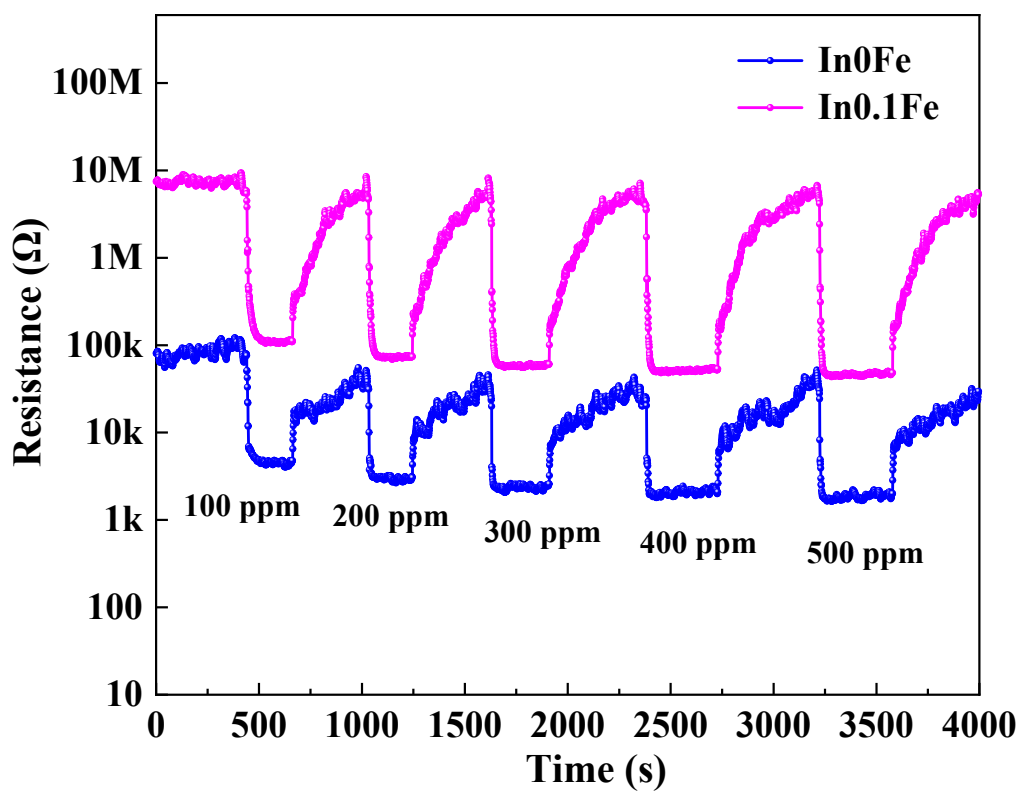

Fig. S3. Transient resistance changes of In<sub>0</sub>Fe and In<sub>0.1</sub>Fe to 100-500 ppm ethanol.

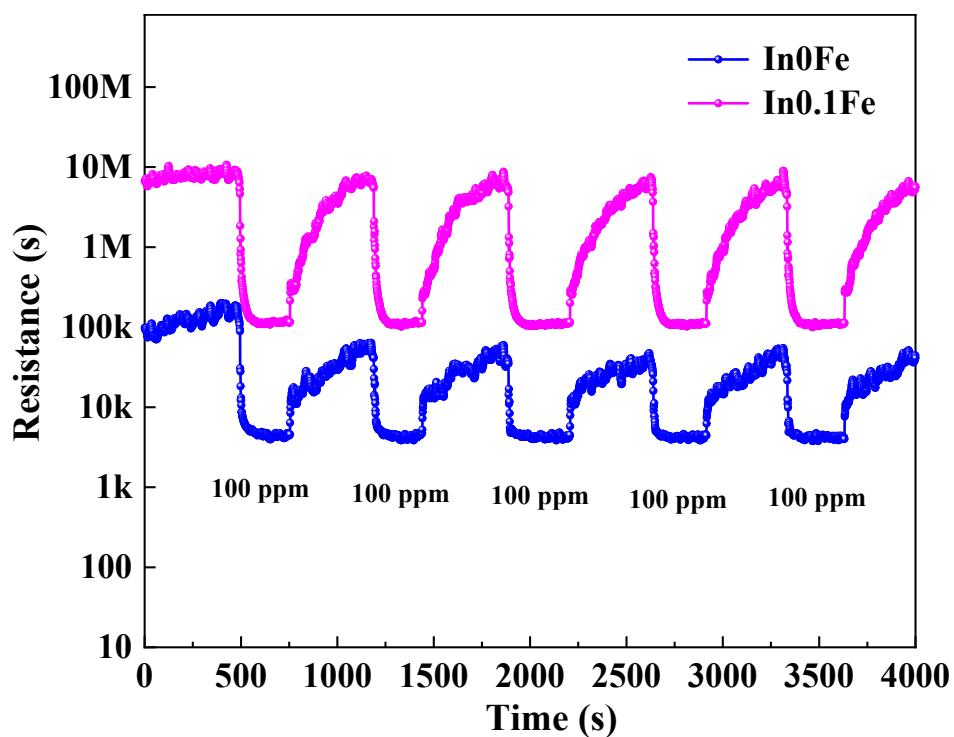

Fig. S4. Transient resistance changes to 100 ppm ethanol of In<sub>0</sub>Fe and In<sub>0.1</sub>Fe.

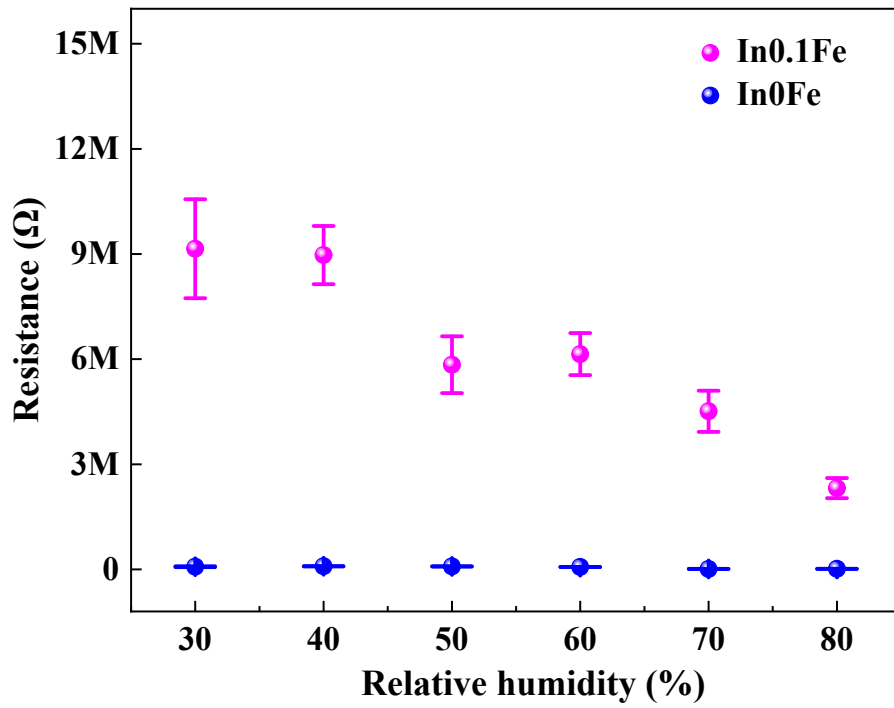

Fig. S5. Plot of mean air resistance values of In0Fe and In0.1Fe with humidity.

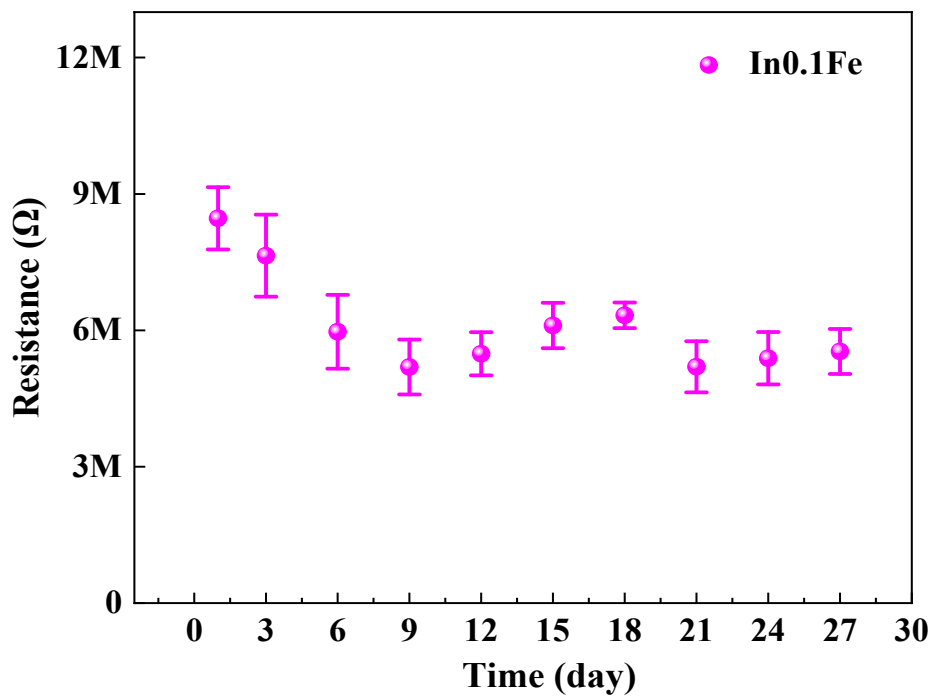

Fig. S6. Average air resistance of In0.1Fe over a 30-day period.
